# Supplementary material for: Validity, reliability, and sensitivity to motor impairment severity of a multi-touch app designed to assess hand mobility, coordination, and function after stroke
Source: PubMed Central journal article supplement (PMC8066975; doi:10.1186/s12984-021-00865-9), 2021-04-23
Supplement: 12984_2021_865_MOESM2_ESM.pdf [file 12984_2021_865_MOESM2_ESM.pdf]

**Additional file 2. Convergent validity of all measures of the *Hand Assessment Test* with clinical instruments**

|                                                                                     | Fugl-Meyer Assessment Scale |                                |              |               |              | Jebsen-Taylor Hand Function Test |                 |                                          |                      |                      |                            |                            | Box<br>and<br>Block<br>Test | Nine<br>Hole<br>Peg<br>Test |
|-------------------------------------------------------------------------------------|-----------------------------|--------------------------------|--------------|---------------|--------------|----------------------------------|-----------------|------------------------------------------|----------------------|----------------------|----------------------------|----------------------------|-----------------------------|-----------------------------|
|                                                                                     | Total<br>score              | Shoulder,<br>elbow,<br>forearm | Wrist        | Hand          | Coordination | Writing                          | Card<br>turning | Picking up<br>small<br>common<br>objects | Stacking<br>checkers | Simulated<br>feeding | Moving<br>light<br>objects | Moving<br>heavy<br>objects |                             |                             |
| <i>Tapping</i>                                                                      | <b>,55**</b>                | <b>,32**</b>                   | <b>,51**</b> | <b>,64**</b>  | <b>,42**</b> | <b>-.31**</b>                    | <b>-.62**</b>   | <b>-.52**</b>                            | <b>-.57**</b>        | <b>-.49**</b>        | <b>-.54**</b>              | <b>-.40**</b>              | <b>,70**</b>                | <b>-.53**</b>               |
| <i>Tapping with the thumb while the remaining digits are weight-bearing</i>         | <b>,51**</b>                | <b>,36**</b>                   | <b>,54**</b> | <b>,52**</b>  | <b>,28*</b>  | <b>-.34**</b>                    | <b>-.59**</b>   | <b>-.57**</b>                            | <b>-.51**</b>        | <b>-.45**</b>        | <b>-.44**</b>              | <b>-.47**</b>              | <b>,69**</b>                | <b>-.53**</b>               |
| <i>Tapping with the index finger while the remaining digits are weight-bearing</i>  | <b>,52**</b>                | <b>,38**</b>                   | <b>,56**</b> | <b>,51**</b>  | <b>,25*</b>  | <b>-.42**</b>                    | <b>-.59**</b>   | <b>-.60**</b>                            | <b>-.57**</b>        | <b>-.46**</b>        | <b>-.53**</b>              | <b>-.56**</b>              | <b>,66**</b>                | <b>-.59**</b>               |
| <i>Tapping with the middle finger while the remaining digits are weight-bearing</i> | <b>,56**</b>                | <b>,51**</b>                   | <b>,50**</b> | <b>,46**</b>  | <b>,29*</b>  | <b>-.37**</b>                    | <b>-.54**</b>   | <b>-.62**</b>                            | <b>-.45**</b>        | <b>-.51**</b>        | <b>-.49**</b>              | <b>-.54**</b>              | <b>,63**</b>                | <b>-.48**</b>               |
| <i>Tapping with the ring finger while the remaining digits are weight-bearing</i>   | <b>,61**</b>                | <b>,52**</b>                   | <b>,52**</b> | <b>,54**</b>  | <b>,46**</b> | <b>-.48**</b>                    | <b>-.53**</b>   | <b>-.59**</b>                            | <b>-.34**</b>        | <b>-.42**</b>        | <b>-.53**</b>              | <b>-.55**</b>              | <b>,55**</b>                | <b>-.45**</b>               |
| <i>Tapping with the little finger while the remaining digits are weight-bearing</i> | <b>,59**</b>                | <b>,52**</b>                   | <b>,56**</b> | <b>,43**</b>  | <b>,36**</b> | <b>-.32*</b>                     | <b>-.49**</b>   | <b>-.61**</b>                            | <b>-.42**</b>        | <b>-.54**</b>        | <b>-.40**</b>              | <b>-.44**</b>              | <b>,64**</b>                | <b>-.42**</b>               |
| <i>Minimum pincer grasp with the index finger</i>                                   | <b>-.23</b>                 | <b>-.08</b>                    | <b>-.24*</b> | <b>-.42**</b> | <b>-.09</b>  | <b>.071</b>                      | <b>.054</b>     | <b>.00</b>                               | <b>,25*</b>          | <b>.20</b>           | <b>.14</b>                 | <b>-.04</b>                | <b>-.30*</b>                | <b>.19</b>                  |
| <i>Maximum pincer grasp with the index finger</i>                                   | <b>,56**</b>                | <b>,46**</b>                   | <b>,50**</b> | <b>,56**</b>  | <b>,26*</b>  | <b>-.28*</b>                     | <b>-.50**</b>   | <b>-.45**</b>                            | <b>-.45**</b>        | <b>-.53**</b>        | <b>-.50**</b>              | <b>-.30**</b>              | <b>,56**</b>                | <b>-.53**</b>               |
| <i>Minimum pincer grasp with the middle finger</i>                                  | <b>-.19</b>                 | <b>.01</b>                     | <b>-.23</b>  | <b>-.48**</b> | <b>-.07</b>  | <b>.14</b>                       | <b>,35**</b>    | <b>,35**</b>                             | <b>,64**</b>         | <b>,32*</b>          | <b>,27*</b>                | <b>.15</b>                 | <b>-.40**</b>               | <b>,53**</b>                |
| <i>Maximum pincer grasp with the middle finger</i>                                  | <b>,45**</b>                | <b>,35**</b>                   | <b>,51**</b> | <b>,44**</b>  | <b>.16</b>   | <b>-.17</b>                      | <b>-.45**</b>   | <b>-.40**</b>                            | <b>-.52**</b>        | <b>-.41**</b>        | <b>-.52**</b>              | <b>-.32**</b>              | <b>,54**</b>                | <b>-.43**</b>               |

|                                                                |               |               |               |               |               |              |               |               |               |               |               |               |               |              |
|----------------------------------------------------------------|---------------|---------------|---------------|---------------|---------------|--------------|---------------|---------------|---------------|---------------|---------------|---------------|---------------|--------------|
| <i>Minimum pincer grasp with the ring finger</i>               | -,36**        | -,27*         | <b>-,42**</b> | <b>-,38**</b> | .02           | .15          | ,32*          | ,31*          | <b>,41**</b>  | <b>,42**</b>  | <b>,51**</b>  | .20           | <b>-,43**</b> | ,29*         |
| <i>Maximum pincer grasp with the ring finger</i>               | <b>,46**</b>  | ,37**         | <b>,50**</b>  | <b>,45**</b>  | .13           | -.14         | <b>-,52**</b> | <b>-,49**</b> | <b>-,47**</b> | <b>-,45**</b> | <b>-,49**</b> | -,36**        | <b>,58**</b>  | -,39**       |
| <i>Minimum pincer grasp with the little finger</i>             | -,36**        | -,27*         | <b>-,41**</b> | -,28*         | -.15          | .03          | ,37**         | <b>,43**</b>  | ,27*          | <b>,59**</b>  | ,30*          | ,26*          | <b>-,54**</b> | .23          |
| <i>Maximum pincer grasp with the little finger</i>             | ,37**         | ,26*          | <b>,49**</b>  | <b>,34**</b>  | .09           | -.16         | <b>-,51**</b> | <b>-,48**</b> | <b>-,41**</b> | -,29*         | <b>-,50**</b> | <b>-,40**</b> | <b>,53**</b>  | -,37**       |
| <i>Hand closing area</i>                                       | .05           | .08           | -.06          | -.01          | .06           | .18          | .16           | .10           | .25           | -.07          | .09           | .01           | -.14          | .18          |
| <i>Hand opening area</i>                                       | <b>,52**</b>  | ,33**         | <b>,45**</b>  | <b>,58**</b>  | ,32**         | -.10         | <b>-,43**</b> | -.22          | -,34**        | -.22          | <b>-,46**</b> | -.14          | <b>,46**</b>  | -,26*        |
| <i>Drawing an "M"</i>                                          | -.24          | -.14          | -.29          | -.035         | <b>-,42**</b> | .19          | ,36*          | <b>,46**</b>  | <b>,69**</b>  | <b>,43**</b>  | <b>,44**</b>  | .27           | <b>-,42**</b> | <b>,62**</b> |
| <i>Drawing an "S"</i>                                          | -.21          | -.10          | -,34*         | -.014         | <b>-,41**</b> | .15          | .25           | ,34*          | <b>,49**</b>  | ,34*          | .21           | .22           | -,37*         | ,40**        |
| <i>Drawing a "3"</i>                                           | -.24          | -.14          | -.22          | -.069         | <b>-,47**</b> | .19          | <b>,48**</b>  | <b>,48**</b>  | <b>,55**</b>  | .26           | <b>,46**</b>  | .23           | <b>-,43**</b> | <b>,58**</b> |
| <i>Drawing a spiral</i>                                        | -.16          | -.01          | -,36*         | -.013         | -,34*         | .24          | .23           | .27           | <b>,48**</b>  | .17           | .23           | .14           | -,31*         | ,35*         |
| <i>Coordination with a finger</i>                              | <b>-,56**</b> | <b>-,40**</b> | <b>-,50**</b> | <b>-,44**</b> | <b>-,60**</b> | <b>,41**</b> | <b>,61**</b>  | <b>,67**</b>  | <b>,65**</b>  | <b>,70**</b>  | <b>,59**</b>  | <b>,65**</b>  | <b>-,70**</b> | <b>,71**</b> |
| <i>Coordination with a pen</i>                                 | <b>-,41**</b> | -,28*         | <b>-,40**</b> | -,34**        | -,27*         | .14          | ,37**         | .40**         | <b>,41**</b>  | <b>,46**</b>  | <b>,49**</b>  | ,38**         | <b>-,50**</b> | <b>,37**</b> |
| <i>Coordination with a pen involving dropping and grasping</i> | -.21          | -.08          | -.19          | -,34**        | -.11          | -.06         | ,33**         | <b>,42**</b>  | <b>,46**</b>  | ,36**         | <b>,42**</b>  | ,37**         | <b>-,40**</b> | <b>,42**</b> |

\*:  $p < 0.05$ . \*\*:  $p < 0.01$ . Moderate or stronger correlations are highlighted in bold.
